# Supplementary material for: An assessment of water placement algorithms in quantum mechanics/molecular mechanics modeling: the case of rhodopsins’ first spectral absorption band maxima
Source: Royal Society of Chemistry journal article supplement (doi:10.1039/d0cp02638g), 2020-01-01
Supplement: d0cp02638g1.pdf [file d0cp02638g1.pdf]

Table S1. QM/MM calculated and experimental absorption maxima values (in nm).

| Rhodopsin                                | RCSB Code | Dowser + + | Dowser | WaterDock | WaterDock-2.0 | Crystallographic | Experiment        |
|------------------------------------------|-----------|------------|--------|-----------|---------------|------------------|-------------------|
| H. salinarum bacteriorhodopsin           | 5ZIM      | 550        | 540    | 576       | 525           | 562              | 568 <sup>1</sup>  |
| H. walsbyi bacteriorhodopsin             | 5ITC      | 515        | 514    | 510       | 502           | 486              | 550 <sup>2</sup>  |
| Archaerhodopsin-1                        | 1UAZ      | 561        | 559    | 574       | 565           | 582              | 555 <sup>3</sup>  |
| Archaerhodopsin-2                        | 3WQJ      | 545        | 550    | 565       | 567           | 549              | 550 <sup>4</sup>  |
| Archaerhodopsin-3                        | 6GUX      | 538        | 553    | 544       | 542           | 550              | 552 <sup>5</sup>  |
| Acetabularia rhodopsin 2                 | 3AM6      | 518        | 519    | 492       | 519           | 490              | 532 <sup>6</sup>  |
| N. pharaonis sensory rhodopsin           | 3QAP      | 464        | 460    | 488       | 465           | 468              | 497 <sup>7</sup>  |
| cruxrhodopsin-3                          | 4JR8      | 568        | 576    | 596       | 555           | 583              | 560 <sup>8</sup>  |
| KR2 sodium pump pH 4.3                   | 4XTL      | 554        | 571    | 585       | 559           | 573              | 566 <sup>9</sup>  |
| E. sibiricum rhodopsin                   | 4HYJ      | 525        | 464    | 469       | 545           | 512              | 534 <sup>10</sup> |
| Acetabularia rhodopsin 1                 | 5AX0      | 514        | 472    | 456       | 472           | 470              | 520 <sup>11</sup> |
| channelrhodopsin-2                       | 6EID      | 451        | 426    | 431       | 390           | 422              | 460 <sup>12</sup> |
| ch1ch2 chimera                           | 3UG9      | 463        | 463    | 456       | 453           | 453              | 470 <sup>13</sup> |
| blue abs. proteorhodopsin                | 4JQ6      | 491        | 509    | 555       | 514           | 551              | 490 <sup>14</sup> |
| xanthorhodopsin                          | 3DDL      | 540        | 536    | 597       | 573           | 531              | 560 <sup>15</sup> |
| deltarhodopsin                           | 4FBZ      | 554        | 532    | 544       | 537           | 556              | 550 <sup>16</sup> |
| H. marismortui bacteriorhodopsin I D94 N | 4PXK      | 554        | 494    | 485       | 520           | 519              | 567 <sup>17</sup> |
| thermophilic rhodopsin                   | 5AZD      | 515        | 470    | 512       | 516           | 485              | 530 <sup>18</sup> |
| Viral rhodopsin OLPVRII                  | 6SQG      | 525        | 535    | 518       | 526           | 535              | 514 <sup>19</sup> |
| gloebacter rhodopsin                     | 6NWD      | 539        | 526    | 569       | 579           | 567              | 545 <sup>20</sup> |
| chrimson                                 | 5ZIH      | 568        | 572    | 575       | 567           | 588              | 590 <sup>21</sup> |
| C. subellipsoidea rhodopsin              | 6GYH      | 528        | 530    | 530       | 531           | 525              | 535 <sup>22</sup> |
| DTS-motif rhodopsin                      | 6J00      | 515        | 495    | 544       | 518           | 518              | 509 <sup>23</sup> |
| GtACR1                                   | 6CSM      | 529        | 528    | 520       | 500           | 505              | 514 <sup>24</sup> |

Table S1, continuation. QM/MM calculated and experimental absorption maxima values (in nm).

| Rhodopsin                                    | RCSB Code | Dowser+ + | Dowser | WaterDock | WaterDock-2.0 | Crystallographic | Experiment        |
|----------------------------------------------|-----------|-----------|--------|-----------|---------------|------------------|-------------------|
| N. pharaonis halorhodopsin Cl-bound          | 3A7K      | 525       | 491    | 532       | 537           | 509              | 578 <sup>25</sup> |
| H. salinarum halorhodopsin Cl-bound          | 1E12      | 544       | 492    | 518       | 512           | 521              | 578 <sup>26</sup> |
| N. pharaonis halorhodopsin anion-free        | 5ETZ      | 565       | 588    | 573       | 574           | 541              | 600 <sup>27</sup> |
| Anabaena sensory rhodopsin                   | 1XIO      | 536       | 513    | 516       | 539           | 549              | 549 <sup>28</sup> |
| KR2 sodium pump pH 8.0                       | 6RF6      | 530       | 500    | 511       | 480           | 501              | 528 <sup>29</sup> |
| HOT75 blue-abs. proteorhodopsin D97N/Q105L   | 4KNF      | 533       | 530    | 546       | 544           | 536              | 520 <sup>30</sup> |
| 48C12 heliorhodopsin pH 4.3                  | 6SU4      | 550       | 491    | 468       | 489           | 483              | 568 <sup>31</sup> |
| Cl-pump CIR Cl-bound                         | 5G28      | 472       | 479    | 463       | 477           | 461              | 530 <sup>32</sup> |
| iC+ +                                        | 6CSN      | 463       | 467    | 445       | 500           | 444              | 483 <sup>33</sup> |
| T. archaeon heliorhodopsin                   | 6IS6      | 493       | 483    | 443       | 528           | 480              | 543 <sup>34</sup> |
| xenorhodopsin                                | 6EYU      | 553       | 547    | 551       | 554           | 556              | 565 <sup>35</sup> |
| H. salinarum bacteriorhodopsin K             | 1M0K      | 563       | 555    | 590       | 536           | 543              | 590 <sup>1</sup>  |
| H. salinarum bacteriorhodopsin L             | 1O0A      | 574       | 552    | 576       | 565           | 561              | 550 <sup>1</sup>  |
| H. salinarum bacteriorhodopsin N             | 1P8U      | 540       | 519    | 560       | 540           | 491              | 560 <sup>1</sup>  |
| N. pharaonis sensory rhodopsin K             | 2F93      | 520       | 579    | 537       | 521           | 534              | 510 <sup>7</sup>  |
| H. salinarum halorhodopsin T203V L1 Cl-bound | 2JAG      | 506       | 504    | 508       | 495           | 499              | 520 <sup>36</sup> |
| bovine rhodopsin                             | 1U19      | 480       | 449    | 486       | 490           | 471              | 500 <sup>37</sup> |
| squid rhodopsin                              | 2Z73      | 480       | 466    | 449       | 468           | 471              | 480 <sup>38</sup> |
| jumping spider rhodopsin-1                   | 6I9K      | 489       | 457    | 495       | 480           | 474              | 505 <sup>39</sup> |
| bovine bathorhodopsin                        | 2G87      | 514       | 535    | 452       | 469           | 504              | 529 <sup>40</sup> |
| bovine lumirhodopsin                         | 2HPY      | 482       | 504    | 480       | 506           | 515              | 492 <sup>40</sup> |
| squid lumirhodopsin                          | 4WW3      | 489       | 474    | 460       | 474           | 497              | 514 <sup>41</sup> |
| squid bathorhodopsin                         | 3AYM      | 489       | 487    | 482       | 480           | 503              | 535 <sup>42</sup> |
| squid isorhodopsin                           | 3AYN      | 447       | 426    | 425       | 416           | 441              | 468 <sup>42</sup> |

Table S2. Protonated titratable residues in the rhodopsin QM/MM models.

| Rhodopsin                                | RCSB Code | Protonated residues                                          |
|------------------------------------------|-----------|--------------------------------------------------------------|
| H. salinarum bacteriorhodopsin           | 5ZIM      | Asp85 (7.07), Asp96 (8.32), Asp115 (7.56), Glu194 (9.51)     |
| H. walsbyi bacteriorhodopsin             | 5ITC      | Asp93 (7.05), Asp104 (8.07), Asp123 (7.26), Glu202 (10.15)   |
| Archaerhodopsin-1                        | 1UAZ      | Asp91 (7.26), Asp102 (7.83), Asp121 (7.27), Glu210 (11.11)   |
| Archaerhodopsin-2                        | 3WQJ      | Asp90 (7.00), Asp101 (8.05), Asp120 (7.24), Glu209 (10.52)   |
| Archaerhodopsin-3                        | 6GUX      | Asp95 (7.50), Asp106 (8.13), Glu214 (10.49)                  |
| Acetabularia rhodopsin 2                 | 3AM6      | Asp81 (7.95), Asp111 (7.31)                                  |
| N. pharaonis sensory rhodopsin           | 3QAP      | Asp75 (7.21)                                                 |
| cruxrhodopsin-3                          | 4JR8      | Asp83 (7.01), Asp94 (8.14), Asp110 (8.70), Glu205 (9.56)     |
| KR2 sodium pump pH 4.3                   | 4XTL      | Asp116 (8.99)                                                |
| E. sibiricum rhodopsin                   | 4HYJ      | His57 (7.01), Asp119 (7.39)                                  |
| Acetabularia rhodopsin 1                 | 5AX0      | Asp89 (7.13)                                                 |
| channelrhodopsin-2                       | 6EID      | Glu90 (9.00), Glu101 (8.79), Glu123 (7.02)                   |
| ch1ch2 chimera                           | 3UG9      | Glu122 (8.51), Glu129 (8.79), Glu139 (7.81), Asp195 (7.47)   |
| blue abs. proteorhodopsin                | 4JQ6      | Glu90 (9.55)                                                 |
| xanthorhodopsin                          | 3DDL      | Glu107 (9.38)                                                |
| deltarhodopsin                           | 4FBZ      | Asp95 (8.58), Glu204 (11.31)                                 |
| H. marismortui bacteriorhodopsin I D94 N | 4PXK      | Asp113 (7.31), Glu209 (11.07)                                |
| thermophilic rhodopsin                   | 5AZD      | Glu106 (8.42)                                                |
| Viral rhodopsin OLPVR II                 | 6SQG      | Glu42 (8.07), Asp74 (7.03)                                   |
| gloebacter rhodopsin                     | 6NWD      | Glu132 (8.53)                                                |
| chrimson                                 | 5ZIH      | Glu132 (11.55), Glu143 (9.00), Glu108 (10.22), Asp295 (7.00) |
| C. subellipsoidea rhodopsin              | 6GYH      | Asp86 (7.02), Asp116 (7.43), Glu193 (7.14)                   |
| DTS-motif rhodopsin                      | 6JO0      | Glu54 (10.62), Asp81 (7.06)                                  |
| GtACR1                                   | 6CSM      | Glu68 (9.39), Glu163 (8.57)                                  |

Table S2, continuation. Protonated titratable residues in the rhodopsin QM/MM models.

| Rhodopsin                                    | RCSB Code | Protonated residues                                       |
|----------------------------------------------|-----------|-----------------------------------------------------------|
| N. pharaonis halorhodopsin Cl-bound          | 3A7K      | Asp156 (7.48)                                             |
| H. salinarum halorhodopsin Cl-bound          | 1E12      | Asp141 (7.09)                                             |
| N. pharaonis halorhodopsin anion-free        | 5ETZ      | Asp156 (7.45)                                             |
| Anabaena sensory rhodopsin                   | 1XIO      | Glu4 (8.88), Glu36 (8.84), Glu62 (13.29), Asp198 (8.36)   |
| KR2 sodium pump pH 8.0                       | 6RF6      | -                                                         |
| HOT75 blue-abs. proteorhodopsin D97N/Q105L   | 4KNF      | -                                                         |
| 48C12 heliorhodopsin pH 4.3                  | 6SU4      | Glu107 (7.10)                                             |
| Cl-pump CIR Cl-bound                         | 5G28      | -                                                         |
| iC++                                         | 6CSN      | -                                                         |
| T. archaeon heliorhodopsin                   | 6IS6      | Glu108 (7.18)                                             |
| xenorhodopsin                                | 6EYU      | Asp76 (7.13)                                              |
| H. salinarum bacteriorhodopsin K             | 1M0K      | Asp85 (7.72), Asp96 (8.83), Asp115 (7.25), Glu204 (10.26) |
| H. salinarum bacteriorhodopsin L             | 1O0A      | Asp85 (7.71), Asp96 (8.44), Asp115 (7.66), Glu204 (9.90)  |
| H. salinarum bacteriorhodopsin N             | 1P8U      | Asp96 (8.64), Asp115 (7.72), Glu204 (9.59)                |
| N. pharaonis sensory rhodopsin K             | 2F93      | Asp75 (8.00)                                              |
| H. salinarum halorhodopsin T203V L1 Cl-bound | 2JAG      | Asp141 (7.11)                                             |
| bovine rhodopsin                             | 1U19      | Asp83 (9.19), Glu122 (9.18), Glu181 (7.28)                |
| squid rhodopsin                              | 2Z73      | Asp80 (7.77)                                              |
| jumping spider rhodopsin-1                   | 6I9K      | Asp96 (7.15), Glu194 (7.11)                               |
| bovine bathorhodopsin                        | 2G87      | Asp83 (9.24), Glu122 (9.16), Glu181 (7.38)                |
| bovine lumirhodopsin                         | 2HPY      | Asp83 (8.47), Glu122 (8.05), Glu181 (7.07)                |
| squid lumirhodopsin                          | 4WW3      | Asp80 (8.10)                                              |
| squid bathorhodopsin                         | 3AYM      | Asp80 (7.82)                                              |
| squid isorhodopsin                           | 3AYN      | Asp80 (7.75)                                              |

Table S3. The direct effect of water molecules on QM/MM calculated  $\lambda_{max}$  values (in nm).

| RCSB Code | Dowser+ + | M[Direct7Å] | M[Direct] |
|-----------|-----------|-------------|-----------|
| 5ZIM      | 550       | 551         | 565       |
| 5ITC      | 515       | 512         | 530       |
| 1UAZ      | 561       | 556         | 583       |
| 3WQJ      | 545       | 541         | 566       |
| 6GUX      | 538       | 539         | 560       |
| 3AM6      | 518       | 514         | 500       |
| 3QAP      | 464       | 463         | 488       |
| 4JR8      | 568       | 568         | 583       |
| 4XTL      | 554       | 552         | 555       |
| 4HYJ      | 525       | 528         | 529       |
| 5AX0      | 514       | 508         | 491       |
| 6EID      | 451       | 448         | 446       |
| 3UG9      | 463       | 467         | 437       |
| 4JQ6      | 491       | 498         | 502       |
| 3DDL      | 540       | 538         | 573       |
| 4FBZ      | 554       | 550         | 551       |
| 4PXK      | 554       | 552         | 508       |
| 5AZD      | 515       | 515         | 488       |
| 6SQG      | 525       | 525         | 522       |
| 6NWD      | 539       | 539         | 562       |
| 5ZIH      | 568       | 571         | 571       |
| 6GYH      | 528       | 524         | 541       |
| 6JO0      | 515       | 515         | 526       |
| 6CSM      | 529       | 528         | 531       |
| 3A7K      | 525       | 525         | 497       |
| 1E12      | 544       | 542         | 515       |
| 5ETZ      | 565       | 565         | 573       |
| 1XIO      | 536       | 533         | 532       |
| 6RF6      | 530       | 533         | 479       |
| 4KNF      | 533       | 534         | 541       |
| 6SU4      | 550       | 555         | 588       |
| 5G28      | 472       | 474         | 459       |
| 6CSN      | 463       | 465         | 462       |
| 6IS6      | 493       | 498         | 490       |
| 6EYU      | 553       | 554         | 561       |
| 1M0K      | 563       | 564         | 576       |
| 1O0A      | 574       | 574         | 582       |
| 1P8U      | 540       | 535         | 525       |
| 2F93      | 520       | 518         | 525       |
| 2JAG      | 506       | 507         | 499       |
| 1U19      | 480       | 476         | 462       |
| 2Z73      | 480       | 479         | 476       |
| 6I9K      | 489       | 489         | 503       |
| 2G87      | 514       | 520         | 499       |
| 2HPY      | 482       | 484         | 471       |
| 4WW3      | 489       | 488         | 470       |
| 3AYM      | 489       | 487         | 488       |
| 3AYN      | 447       | 446         | 441       |

### Dowser and Dowser++ parameter set for the retinal protonated Schiff base (atomdict.db file).

RESIDUE REL TERM NH3 COO  
ATOM REL N C CA 1.320 114.0 180.0 -0.280 N  
ATOM REL H N NOT 1.000 123.0 0.0 0.280 H  
ATOM REL CA N C 1.470 123.0 180.0 0.000 CH1  
ATOM REL CB CA CG 1.530 110.0 60.0 0.000 CH2  
ATOM REL CG CB CD 1.530 112.0 180.0 0.000 CH2  
ATOM REL CD CG CE 1.530 112.0 180.0 0.000 CH2  
ATOM REL CE CD NZ 1.530 112.0 180.0 0.450 CH2  
ATOM REL NZ CE HZ1 1.470 112.0 180.0 0.380 N  
ATOM REL HZ1 NZ NOT 1.000 109.5 180.0 -0.400 H  
ATOM REL C15 NZ C14 1.280 125.6 180.0 0.570 CH1  
ATOM REL C14 C15 C13 1.470 123.0 0.0 0.000 CH1  
ATOM REL C13 C14 C12 1.400 123.0 180.0 0.000 CR  
ATOM REL C20 C13 NOT 1.520 120.0 180.0 0.000 CH3  
ATOM REL C12 C13 C11 1.400 123.0 180.0 0.000 CH1  
ATOM REL C11 C12 C10 1.370 123.0 180.0 0.000 CH1  
ATOM REL C10 C11 C9 1.400 123.0 180.0 0.000 CH1  
ATOM REL C9 C10 C8 1.370 123.0 180.0 0.000 CR  
ATOM REL C19 C9 NOT 1.504 120.0 0.0 0.000 CH3  
ATOM REL C8 C9 C7 1.470 123.5 -180.0 0.000 CH1  
ATOM REL C7 C8 C6 1.340 123.5 180.0 0.000 CH1  
ATOM REL C6 C7 C1 1.470 123.5 180.0 0.000 CR  
ATOM REL C1 C6 C2 1.500 112.2 0.0 0.000 CR  
ATOM REL C16 C1 NOT 1.538 112.2 -60.0 0.000 CH3  
ATOM REL C17 C1 NOT 1.538 112.2 -60.0 0.000 CH3  
ATOM REL C5 C6 C4 1.340 123.5 180.0 0.000 CR  
ATOM REL C18 C5 NOT 1.500 123.5 0.0 0.000 CH3  
ATOM REL C4 C5 C3 1.500 112.0 0.0 0.000 CH2  
ATOM REL C3 C4 C2 1.530 113.6 -60.0 0.000 CH2  
ATOM REL C2 C3 C1 1.530 113.5 60.9 0.000 CH2  
ATOM REL C CA N 1.530 110.0 180.0 0.380 CR  
ATOM REL O C NOT 1.240 121.0 0.0 -0.380 O

### References

- [1] M. L. Mak-Jurkauskas, V. S. Bajaj, M. K. Hornstein, M. Belenky, R. G. Griffin and J. Herzfeld, *Proceedings of the National Academy of Sciences*, 2008, **105**, 883–888.
- [2] J. Broecker, B. T. Eger and O. P. Ernst, *Structure*, 2017, **25**, 384–392.
- [3] N. Enami, K. Yoshimura, M. Murakami, H. Okumura, K. Ihara and T. Kouyama, *Journal of molecular biology*, 2006, **358**, 675–685.
- [4] T. Kouyama, R. Fujii, S. Kanada, T. Nakanishi, S. K. Chan and M. Murakami, *Acta Crystallographica Section D: Biological Crystallography*, 2014, **70**, 2692–2701.
- [5] D. Maclaurin, V. Venkatachalam, H. Lee and A. E. Cohen, *Proceedings of the National Academy of Sciences*, 2013, **110**, 5939–5944.
- [6] T. Wada, K. Shimono, T. Kikukawa, M. Hato, N. Shinya, S. Y. Kim, T. Kimura-Someya, M. Shirouzu, J. Tamogami, S. Miyauchi *et al.*, *Journal of molecular biology*, 2011, **411**, 986–998.
- [7] I. Chizhov, G. Schmies, R. Seidel, J. R. Sydor, B. Lüttenberg and M. Engelhard, *Biophysical Journal*, 1998, **75**, 999–1009.
- [8] S. K. Chan, T. Kitajima-Ihara, R. Fujii, T. Gotoh, M. Murakami, K. Ihara and T. Kouyama, *PLoS one*, 2014, **9**, year.
- [9] I. Gushchin, V. Shevchenko, V. Polovinkin, K. Kovalev, A. Alekseev, E. Round, V. Borshchevskiy, T. Balandin, A. Popov, T. Gensch *et al.*, *Nature structural & molecular biology*, 2015, **22**, 390.
- [10] I. Gushchin, P. Chervakov, P. Kuzmichev, A. N. Popov, E. Round, V. Borshchevskiy, A. Ishchenko, L. Petrovskaya, V. Chupin, D. A. Dolgikh *et al.*, *Proceedings of the National Academy of Sciences*, 2013, **110**, 12631–12636.
- [11] M. Furuse, J. Tamogami, T. Hosaka, T. Kikukawa, N. Shinya, M. Hato, N. Ohsawa, S. Y. Kim, K.-H. Jung, M. Demura *et al.*, *Acta Crystallographica Section D: Biological Crystallography*, 2015, **71**, 2203–2216.
- [12] G. Nagel, T. Szellas, W. Huhn, S. Kateriya, N. Adeishvili, P. Berthold, D. Ollig, P. Hegemann and E. Bamberg, *Proceedings of the National Academy of Sciences*, 2003, **100**, 13940–13945.

- [13] H. E. Kato, F. Zhang, O. Yizhar, C. Ramakrishnan, T. Nishizawa, K. Hirata, J. Ito, Y. Aita, T. Tsukazaki, S. Hayashi *et al.*, *Nature*, 2012, **482**, 369–374.
- [14] W.-W. Wang, O. A. Sineshchekov, E. N. Spudich and J. L. Spudich, *Journal of Biological Chemistry*, 2003, **278**, 33985–33991.
- [15] H. Luecke, B. Schobert, J. Stagno, E. S. Imasheva, J. M. Wang, S. P. Balashov and J. K. Lanyi, *Proceedings of the National Academy of Sciences*, 2008, **105**, 16561–16565.
- [16] J. Zhang, K. Mizuno, Y. Murata, H. Koide, M. Murakami, K. Ihara and T. Kouyama, *Proteins: Structure, Function, and Bioinformatics*, 2013, **81**, 1585–1592.
- [17] V. Shevchenko, I. Gushchin, V. Polovinkin, E. Round, V. Borshchevskiy, P. Utrobin, A. Popov, T. Balandin, G. Büldt and V. Gordeliy, *PloS one*, 2014, **9**, year.
- [18] T. Tsukamoto, K. Mizutani, T. Hasegawa, M. Takahashi, N. Honda, N. Hashimoto, K. Shimono, K. Yamashita, M. Yamamoto, S. Miyauchi *et al.*, *Journal of Biological Chemistry*, 2016, **291**, 12223–12232.
- [19] D. Bratanov, K. Kovalev, J.-P. Machtens, R. Astashkin, I. Chizhov, D. Soloviov, D. Volkov, V. Polovinkin, D. Zabelskii, T. Mager *et al.*, *Nature communications*, 2019, **10**, 1–13.
- [20] T. Morizumi, W.-L. Ou, N. Van Eps, K. Inoue, H. Kandori, L. S. Brown and O. P. Ernst, *Scientific reports*, 2019, **9**, 1–14.
- [21] K. Oda, J. Vierock, S. Oishi, S. Rodriguez-Rozada, R. Taniguchi, K. Yamashita, J. S. Wiegert, T. Nishizawa, P. Hegemann and O. Nureki, *Nature communications*, 2018, **9**, 1–11.
- [22] R. Fudim, M. Szczepek, J. Vierock, A. Vogt, A. Schmidt, G. Kleinau, P. Fischer, F. Bartl, P. Scheerer and P. Hegemann, *Sci. Signal.*, 2019, **12**, eaav4203.
- [23] D. M. Needham, S. Yoshizawa, T. Hosaka, C. Poirier, C. J. Choi, E. Hehenberger, N. A. Irwin, S. Wilken, C.-M. Yung, C. Bachy *et al.*, *Proceedings of the National Academy of Sciences*, 2019, **116**, 20574–20583.
- [24] Y. S. Kim, H. E. Kato, K. Yamashita, S. Ito, K. Inoue, C. Ramakrishnan, L. E. Fenno, K. E. Evans, J. M. Paggi, R. O. Dror *et al.*, *Nature*, 2018, **561**, 343–348.
- [25] T. Kouyama, S. Kanada, Y. Takeguchi, A. Narusawa, M. Murakami and K. Ihara, *Journal of molecular biology*, 2010, **396**, 564–579.
- [26] M. Kolbe, H. Besir, L.-O. Essen and D. Oesterheld, *Science*, 2000, **288**, 1390–1396.
- [27] B. Scharf and M. Engelhard, *Biochemistry*, 1994, **33**, 6387–6393.
- [28] L. Vogeley, O. A. Sineshchekov, V. D. Trivedi, J. Sasaki, J. L. Spudich and H. Luecke, *Science*, 2004, **306**, 1390–1393.
- [29] K. Kovalev, V. Polovinkin, I. Gushchin, A. Alekseev, V. Shevchenko, V. Borshchevskiy, R. Astashkin, T. Balandin, D. Bratanov, S. Vaganova *et al.*, *Science advances*, 2019, **5**, eaav2671.
- [30] J. J. Amsden, J. M. Kralj, V. B. Bergo, E. N. Spudich, J. L. Spudich and K. J. Rothschild, *Biochemistry*, 2008, **47**, 11490–11498.
- [31] K. Kovalev, D. Volkov, R. Astashkin, A. Alekseev, I. Gushchin, J. M. Haro-Moreno, I. Chizhov, S. Siletsky, M. Mamedov, A. Rogachev *et al.*, *Proceedings of the National Academy of Sciences*, 2020, **117**, 4131–4141.
- [32] K. Kim, S.-K. Kwon, S.-H. Jun, J. S. Cha, H. Kim, W. Lee, J. F. Kim and H.-S. Cho, *Nature communications*, 2016, **7**, 1–10.
- [33] H. E. Kato, Y. S. Kim, J. M. Paggi, K. E. Evans, W. E. Allen, C. Richardson, K. Inoue, S. Ito, C. Ramakrishnan, L. E. Fenno *et al.*, *Nature*, 2018, **561**, 349–354.
- [34] W. Shihoya, K. Inoue, M. Singh, M. Konno, S. Hososhima, K. Yamashita, K. Ikeda, A. Higuchi, T. Izume, S. Okazaki *et al.*, *Nature*, 2019, **574**, 132–136.
- [35] V. Shevchenko, T. Mager, K. Kovalev, V. Polovinkin, A. Alekseev, J. Juettner, I. Chizhov, C. Bamann, C. Vavourakis, R. Ghai *et al.*, *Science advances*, 2017, **3**, e1603187.
- [36] W. Gmelin, K. Zeth, R. Efremov, J. Heberle, J. Tittor and D. Oesterheld, *Photochemistry and photobiology*, 2007, **83**, 369–377.
- [37] T. P. Sakmar, R. R. Franke and H. G. Khorana, *Proceedings of the National Academy of Sciences*, 1989, **86**, 8309–8313.
- [38] M. Murakami and T. Kouyama, *Nature*, 2008, **453**, 363–367.
- [39] N. Varma, E. Mutt, J. Mühle, V. Panneels, A. Terakita, X. Deupi, P. Nogly, G. F. Schertler and E. Lesca, *Proceedings of the National Academy of Sciences*, 2019, **116**, 14547–14556.
- [40] B. Nickle and P. Robinson, *Cellular and molecular life sciences*, 2007, **64**, 2917–2932.
- [41] M. Murakami and T. Kouyama, *PloS one*, 2015, **10**, year.
- [42] M. Murakami and T. Kouyama, *Journal of molecular biology*, 2011, **413**, 615–627.
